# Supplementary material for: Metabolic Health Has Greater Impact on Diabetes than Simple Overweight/Obesity in Mexican Americans
Source: Hindawi journal article supplement (doi:10.1155/2016/4094876), 2016-01-01
Supplement: f1 [file 4094876.f1.pdf]

**Supplemental Table 1.** Cohort Demographics and Metabolic Characteristics Stratified by Overweight and Obese Types and Metabolic Health Status: Cameron County Health Cohort Study (2003-2014)<sup>1,2</sup>

| Variable                                                                         | Total<br>(n=3247) | Metabolically Healthy               |                                  |                             | Metabolically Unhealthy        |                              |                             | P-value |
|----------------------------------------------------------------------------------|-------------------|-------------------------------------|----------------------------------|-----------------------------|--------------------------------|------------------------------|-----------------------------|---------|
|                                                                                  |                   | Normal weight<br>(n=475,<br>14.63%) | Overweight<br>(n=726,<br>22.36%) | Obese<br>(n=868,<br>38.82%) | Normal weight<br>(n=72, 2.22%) | Overweight<br>(n=314, 9.68%) | Obese<br>(n=792,<br>24.39%) |         |
| <b>Categorical variables, n (%)</b>                                              |                   |                                     |                                  |                             |                                |                              |                             |         |
| Men                                                                              | 1108 (34.11)      | 139 (29.26)                         | 284 (39.12)                      | 260 (29.95)                 | 25 (34.72)                     | 120 (38.22)                  | 280 (35.35)                 | 0.0004  |
| Employed                                                                         | 1618 (49.83)      | 242 (50.95)                         | 391 (53.86)                      | 431 (49.65)                 | 25 (34.72)                     | 146 (46.50)                  | 383 (48.36)                 | 0.005   |
| Education, below high school                                                     | 1693 (52.14)      | 195 (41.05)                         | 372 (51.24)                      | 441 (50.81)                 | 37 (51.39)                     | 188 (59.87)                  | 460 (58.08)                 | <0.0001 |
| Met minimum recommendations for physical activity of $\geq 600$ MET-minutes/week | 337 (10.38)       | 48 (10.11)                          | 101 (13.91)                      | 91 (10.48)                  | 1 (1.39)                       | 34 (10.83)                   | 62 (7.83)                   | 0.01    |
| Met recommendations of $\geq 5$ servings of fruit & vegetables per day           | 113 (3.48)        | 9 (1.89)                            | 35 (4.82)                        | 32 (3.69)                   | 4 (5.56)                       | 11 (3.50)                    | 22 (2.78)                   | 0.06    |
| Current smokers                                                                  | 495 (15.24)       | 64 (13.47)                          | 100 (13.77)                      | 122 (14.06)                 | 14 (19.44)                     | 60 (19.11)                   | 135 (17.05)                 | 0.03    |
| Ever smokers                                                                     | 984 (30.3)        | 119 (25.05)                         | 220 (29.99)                      | 258 (29.72)                 | 21 (29.17)                     | 111 (35.35)                  | 255 (32.20)                 | 0.04    |
| Ever alcohol drinkers                                                            | 1230 (37.88)      | 186 (39.16)                         | 293 (40.36)                      | 308 (35.48)                 | 20 (27.78)                     | 120 (38.22)                  | 303 (38.26)                 | 0.13    |
| Family history of diabetes                                                       | 1749 (53.87)      | 165 (34.74)                         | 354 (48.76)                      | 522 (60.14)                 | 41 (56.94)                     | 175 (55.73)                  | 492 (62.12)                 | <0.0001 |
| <b>Continuous variables, Mean (SE)</b>                                           |                   |                                     |                                  |                             |                                |                              |                             |         |
| Age at enrollment (years)                                                        | 46.00 (0.68)      | 40.59 (1.90)                        | 43.59 (1.26)                     | 45.48 (0.92)                | 53.96 (3.04)                   | 52.42 (1.89)                 | 48.81 (1.35)                | <.0001  |
| Annual household income (US dollars)                                             | 22360 (872.29)    | 19617 (1725.45)                     | 24646 (1830.93)                  | 24483 (1931.39)             | 14043 (1352.69)                | 18623 (1657.21)              | 21207 (1318.70)             | <.0001  |
| Years of education                                                               | 10.41 (0.15)      | 11.58 (0.39)                        | 11.04 (0.24)                     | 10.40 (0.24)                | 10.24 (0.69)                   | 9.44 (0.33)                  | 9.60 (0.34)                 | <.0001  |
| MET minutes/wk. of all activity                                                  | 1913.02 (384.71)  | 1393.1 (447.28)                     | 2124.99 (767.66)                 | 2600.89 (1076.99)           | 167.15 (107.35)                | 891.94 (456.73)              | 1667.76 (797.13)            | 0.0006  |
| MET minutes/wk. of moderate and vigorous activity                                | 1217.83 (154.52)  | 1115.31 (262.12)                    | 1858.89 (432.87)                 | 1289.06 (343.69)            | 67.47 (48.33)                  | 707.27 (150.99)              | 792.63 (196.32)             | <.0001  |
| Total cholesterol (mg/dL)                                                        | 183.58 (1.14)     | 176.41 (2.62)                       | 182.28 (2.45)                    | 183.21 (2.20)               | 188.24 (7.55)                  | 194.44 (3.40)                | 185.08 (2.05)               | 0.002   |
| Triglycerides (mg/dL)                                                            | 162.37 (3.62)     | 98.80 (3.25)                        | 119.91 (4.81)                    | 129.41 (5.14)               | 195.41 (13.61)                 | 243.70 (14.62)               | 236.63 (8.12)               | <.0001  |
| HDL-cholesterol (mg/dL)                                                          | 46.45 (0.38)      | 53.73 (1.06)                        | 50.76 (0.64)                     | 48.15 (0.60)                | 42.67 (1.32)                   | 39.79 (0.70)                 | 39.58 (0.56)                | <.0001  |

|                                            |                  |               |               |                  |               |               |               |        |
|--------------------------------------------|------------------|---------------|---------------|------------------|---------------|---------------|---------------|--------|
| LDL-cholesterol (mg/dL)                    | 107.38<br>(1.00) | 103.14 (2.28) | 109.73 (2.29) | 109.98<br>(1.79) | 108.64 (6.82) | 111.11 (3.19) | 103.78 (1.93) | 0.04   |
| Body mass index (kg/m <sup>2</sup> )       | 30.99 (0.21)     | 22.44 (0.16)  | 27.37 (0.08)  | 35.45 (0.30)     | 22.53 (0.47)  | 27.81 (0.15)  | 36.46 (0.33)  | <.0001 |
| Waist circumference (cm)                   | 102.87<br>(0.47) | 84.69 (0.91)  | 94.73 (0.40)  | 111.37<br>(0.66) | 86.98 (0.91)  | 98.63 (0.69)  | 114.73 (0.75) | <.0001 |
| Waist-to-hip ratio                         | 0.93 (0.002)     | 0.88 (0.01)   | 0.91 (0.005)  | 0.94 (0.003)     | 0.89 (0.01)   | 0.95 (0.007)  | 0.96 (0.003)  | <.0001 |
| Body fat (%)                               | 35.59 (0.47)     | 25.80 (0.88)  | 31.56 (0.75)  | 41.11 (0.91)     | 27.69 (3.39)  | 32.98 (1.26)  | 40.37 (0.92)  | <.0001 |
| C-reactive protein (mg/L)                  | 3.90 (1.04)      | 1.53 (1.08)   | 2.02 (1.06)   | 3.28 (1.05)      | 1.86 (1.15)   | 2.86 (1.09)   | 3.29 (1.07)   | <.0001 |
| Systolic blood pressure (mmHg)             | 116.92<br>(0.55) | 107.53 (1.38) | 112.06 (0.77) | 114.47<br>(0.74) | 126.04 (3.38) | 126.24 (1.50) | 125.11 (1.19) | <.0001 |
| Diastolic blood pressure (mmHg)            | 71.19 (0.32)     | 66.24 (1.18)  | 68.83 (0.48)  | 71.23 (0.50)     | 71.89 (1.51)  | 73.79 (0.91)  | 75.22 (0.69)  | <.0001 |
| Insulin (mg/dL) <sup>3</sup>               | 12.55 (1.02)     | 7.70 (1.07)   | 9.51 (1.04)   | 13.75 (1.03)     | 9.12 (1.14)   | 12.31 (1.05)  | 19.69 (1.03)  | <.0001 |
| Fasting blood glucose (mg/dL) <sup>3</sup> | 105.64<br>(1.01) | 93.76 (1.01)  | 99.32 (1.01)  | 103.31<br>(1.01) | 110.92 (1.07) | 111.70 (1.03) | 121.86 (1.02) | <.0001 |
| HOMA IR <sup>3</sup>                       | 3.29 (1.02)      | 1.82 (1.07)   | 2.33 (1.04)   | 3.50 (1.03)      | 2.53 (1.17)   | 3.39 (1.05)   | 5.90 (1.04)   | <.0001 |
| HbA1c (%) <sup>3</sup>                     | 5.53 (1.01)      | 5.04 (1.02)   | 5.20 (1.02)   | 5.43 (1.01)      | 6.25 (1.04)   | 5.69 (1.03)   | 6.04 (1.02)   | <.0001 |

<sup>1</sup>Abbreviation: LDL: low-density lipoprotein; Hb: hemoglobin; HDL: high-density lipoprotein; HOMA IR: homeostatic model assessment insulin resistance; MET: metabolic equivalent

<sup>2</sup>All descriptive results and the models were adjusted for the probability of sampling using weights taking into consideration clustering effects arising from the same census block and household. Linear regression models were used for continuous variables and Rao-Scott F adjusted chi-square statistic for categorical variables.

<sup>3</sup>Geometric concentrations.

**Supplemental Table 2** Diabetes by Overweight and Obese Type and Metabolic Health Status

| Diabetes                                    | Metabolically Healthy    |                       |                   | Metabolically Unhealthy |                       |                    | P-value             |
|---------------------------------------------|--------------------------|-----------------------|-------------------|-------------------------|-----------------------|--------------------|---------------------|
|                                             | Normal weight<br>(n=475) | Overweight<br>(n=726) | Obese<br>(n=868)  | Normal weight<br>(n=72) | Overweight<br>(n=314) | Obese<br>(n=792)   |                     |
| Frequency                                   |                          |                       |                   |                         |                       |                    |                     |
| Yes [n, (%)]                                | 57 (12.00)               | 129 (17.77)           | 220 (25.35)       | 26 (36.11)              | 97 (30.89)            | 349 (44.07)        | <.0001 <sup>1</sup> |
| No [n, (%)]                                 | 401 (84.42)              | 578 (79.61)           | 630 (72.58)       | 42 (58.33)              | 206 (65.61)           | 435 (54.92)        |                     |
| Weighted OR (95% CI)                        |                          |                       |                   |                         |                       |                    |                     |
| Unadjusted model                            | Reference                | 1.77 (1.06, 2.94)     | 2.85 (1.79, 4.52) | 5.20 (2.41, 11.19)      | 4.21 (2.31, 7.69)     | 7.16 (4.40, 11.66) | <.0001 <sup>2</sup> |
| Multivariable-adjusted model 1 <sup>3</sup> | Reference                | 1.76 (0.98, 3.18)     | 2.75 (1.61, 4.68) | 3.76 (1.56, 9.11)       | 3.25 (1.71, 6.19)     | 6.50 (3.65, 11.55) | <.0001 <sup>2</sup> |
| Multivariable-adjusted model 2 <sup>4</sup> | Reference                | 1.69 (0.76, 3.74)     | 2.60 (1.31, 5.18) | 3.17 (1.01, 9.99)       | 3.50 (1.53, 7.99)     | 5.66 (2.60, 12.31) | <.0001 <sup>2</sup> |

<sup>1</sup> F approximation of Rao-Scott design-adjusted Chi-square test P-value.

<sup>2</sup> P-values from Wald Chi-square test for the effect of overweight/obese phenotype.

<sup>3</sup> Adjusted for age at enrollment. Other covariates were not significant and not included in the final model. The models were adjusted for the probability of sampling using weights taking into consideration clustering effects arising from the same census block and household.

<sup>4</sup> Adjusted for age at enrollment and family history of diabetes. Restricted to the participants who had data for family history of diabetes (n=2,234, 68%).
